# Supplementary material for: Determination of Prenatal Substance Exposure Using Meconium and Orbitrap Mass Spectrometry
Source: MDPI journal article supplement (doi:10.3390/toxics10020055), 2022-01-26
Supplement: s1 [file s1]

# Supplementary Materials: Determination of prenatal substance exposure using meconium and Orbitrap mass spectrometry

Atakan Hernandez, Valerie Lacroze, Natalia Doudka, Jenny Becam, Carole Pourriere-Fabiani, Bruno Lacarelle, Caroline Solas and Nicolas Fabresse

**Table S1.** Substances identified in meconium samples.

| N°. | Substances identified in meconium                                                                                                                                                                                      |
|-----|------------------------------------------------------------------------------------------------------------------------------------------------------------------------------------------------------------------------|
| 1   | <b>Biomarkers of tobacco exposure:</b><br>Anabasine, nicotine, cotinine-N-oxide, trans-3-hydroxycotinine, cotinine                                                                                                     |
|     | <b>Biomarkers of cannabis exposure:</b><br>Cannabinol, THC-COOH-glucuronide                                                                                                                                            |
| 2   | <b>Biomarkers of tobacco exposure:</b><br>Anabasine, cotinine                                                                                                                                                          |
|     | <b>Biomarkers of cannabis exposure:</b><br>Cannabinol; THC-COOH, THC-COOH-glucuronide                                                                                                                                  |
|     | <b>Pharmaceuticals:</b><br>Ropivacaine, lidocaine, prilocaine                                                                                                                                                          |
|     | clobazam, diazepam, nordiazepam, 4-hydroxynordiazepam, oxazepam, temazepam, norfentanyl, salbutamol                                                                                                                    |
| 3   | <b>Biomarkers of tobacco exposure:</b><br>Anabasine, cotinine, trans-3-hydroxycotinine                                                                                                                                 |
|     | <b>Biomarkers of cannabis exposure:</b><br>Cannabinol, THC-COOH-glucuronide                                                                                                                                            |
|     | <b>Biomarkers of cocaine exposure:</b><br>Cocaine, benzoylecgonine                                                                                                                                                     |
|     | <b>Pharmaceuticals:</b><br>Metoclopramide, norfentanyl, pantoprazole, paracétamol, ropivacaine, lidocaine                                                                                                              |
| 4   | <b>Biomarkers of tobacco exposure:</b><br>Anabasine, nicotine, cotinine, trans-3-hydroxycotinine                                                                                                                       |
|     | <b>Biomarkers of cocaine exposure:</b><br>Cocaine, norcocaine, benzoylecgonine, ecgonine methyl ester, norbenzoylecgonine, levamisole (cocaine adulterant), cocaethylene (biomarker of alcohol and cocaine coexposure) |
|     | <b>Pharmaceuticals:</b><br>Norfentanyl, ropivacaine                                                                                                                                                                    |
|     | <b>Biomarkers of tobacco exposure:</b><br>Anabasine, cotinine, nicotine, cotinine-N-oxide, trans-3-hydroxycotinine                                                                                                     |
| 5*  | <b>Biomarkers of cannabis exposure:</b><br>Cannabinol, THC-COOH, THC-COOH-glucuronide                                                                                                                                  |
|     | <b>Biomarkers of cocaine exposure:</b><br>Cocaine, benzoylecgonine                                                                                                                                                     |
|     | <b>Pharmaceuticals:</b><br>Lidocaine, 3-hydroxylidocaine, ropivacaine, norfentanyl, quétiapine                                                                                                                         |
|     | <b>Biomarkers of tobacco exposure:</b><br>Anabasine, cotinine                                                                                                                                                          |
| 6   | <b>Biomarkers of cannabis exposure:</b><br>11-OH-THC, cannabinol, THC-COOH-glucuronide                                                                                                                                 |
|     | <b>Pharmaceuticals:</b><br>Lidocaine, norfentanyl, ropivacaine, secnidazole                                                                                                                                            |
|     | <b>Biomarkers of tobacco exposure:</b><br>Anabasine, cotinine, cotinine-N-oxide                                                                                                                                        |
| 7   | <b>Biomarkers of cocaine exposure:</b>                                                                                                                                                                                 |

|     |                                                                                                                                                                                                                                                        |
|-----|--------------------------------------------------------------------------------------------------------------------------------------------------------------------------------------------------------------------------------------------------------|
|     | Benzoyllecgonine, hydroxybenzoyllecgonine, norbenzoyllecgonine                                                                                                                                                                                         |
|     | <b>Pharmaceuticals:</b><br>Methadone, EDDP, lidocaine                                                                                                                                                                                                  |
|     | <b>Biomarkers of tobacco exposure:</b><br>Cotinine                                                                                                                                                                                                     |
| 8   | <b>Pharmaceuticals:</b><br>Buprenorphine, norbuprenorphine, norfentanyl, diazepam, oxazepam, quetiapine                                                                                                                                                |
| 9   | <b>Pharmaceuticals:</b><br>Bupivacaine, cefazoline, cimetidine, cyamemazine, ropivacaine                                                                                                                                                               |
|     | <b>Biomarkers of tobacco exposure:</b><br>Cotinine, anabasine                                                                                                                                                                                          |
| 10  | <b>Pharmaceuticals:</b><br>Oxazepam, norfentanyl                                                                                                                                                                                                       |
| 11  | NF                                                                                                                                                                                                                                                     |
| 12  | <b>Biomarkers of cannabis exposure:</b><br>THC, 11-OH-THC                                                                                                                                                                                              |
|     | <b>Biomarkers of tobacco exposure:</b><br>Anabasine, cotinine                                                                                                                                                                                          |
| 13  | <b>Biomarkers of cocaine exposure:</b><br>Benzoyllecgonine, cocaine, ecgonine methyl ester                                                                                                                                                             |
|     | <b>Pharmaceuticals:</b><br>Amoxicillin                                                                                                                                                                                                                 |
|     | <b>Biomarkers of tobacco exposure:</b><br>Anabasine                                                                                                                                                                                                    |
| 14* | <b>Biomarkers of cannabis exposure:</b><br>11-OH-THC, THC-COOH-glucuronide, THC-COOH, cannabicitran, cannabinodiol, THC                                                                                                                                |
|     | <b>Pharmaceuticals:</b><br>Bromazepam, 3-hydroxybromazepam, lorazepam, lormetazepam, midazolam, hydroxymidazolam, nordiazepam, oxazepam, temazepam, cefotaxime, domperidone, laudanosine, morphine, N-desmethyltramadol, O-desmethyltramadol, tramadol |
|     | <b>Biomarkers of tobacco exposure:</b><br>Anabasine                                                                                                                                                                                                    |
| 15  | <b>Pharmaceuticals:</b><br>Darunavir, lamivudine, lidocaine, nevirapine, norfentanyl, norlidocaine, ropivacaine, zidovudine                                                                                                                            |
|     | <b>Biomarkers of tobacco exposure:</b><br>Cotinine, anabasine                                                                                                                                                                                          |
| 16  | <b>Biomarkers of cannabis exposure:</b><br>THC-COOH-glucuronide, cannabinol                                                                                                                                                                            |
|     | <b>Pharmaceuticals:</b><br>3-hydroxylidocaine, lidocaine, norlidocaine, ropivacaine, methylphenidate, norfentanyl                                                                                                                                      |
|     | <b>Biomarkers of tobacco exposure:</b><br>Anabasine, cotinine                                                                                                                                                                                          |
| 17  | <b>Pharmaceuticals:</b><br>Lidocaine, norfentanyl, norlidocaine, paracetamol, ropivacaine                                                                                                                                                              |
|     | <b>Biomarkers of tobacco exposure:</b><br>Anabasine, cotinine                                                                                                                                                                                          |
| 18  | <b>Pharmaceuticals:</b><br>EDDP, methadone, midazolam, hydroxymidazolam, levetiracetam, morphine, paracetamol                                                                                                                                          |
|     | <b>Biomarkers of tobacco exposure:</b><br>Anabasine                                                                                                                                                                                                    |
| 19  | <b>Pharmaceuticals:</b><br>Amoxicillin, codeine, cotinine, lamotrigine, morphine, morphine-3-glucuronide, norcodeine, normorphine, paracetamol, nordiazepam, oxazepam, temazepam, zolpidem                                                             |
|     | <b>Biomarkers of tobacco exposure:</b><br>Anabasine, cotinine                                                                                                                                                                                          |
| 20  | <b>Pharmaceuticals:</b><br>Desmethylnepomam, norfentanyl, tramadol                                                                                                                                                                                     |

|    |                                                                                                                                                                                                                                     |
|----|-------------------------------------------------------------------------------------------------------------------------------------------------------------------------------------------------------------------------------------|
| 21 | <b>Biomarkers of tobacco exposure:</b><br>Anabasine, cotinine                                                                                                                                                                       |
|    | <b>Biomarkers of cannabis exposure:</b><br>THC-COOH                                                                                                                                                                                 |
|    | <b>Pharmaceuticals:</b><br>3-hydroxyropivacaine, lidocaine, norfentanyl, norlidocaine, ropivacaine                                                                                                                                  |
| 22 | <b>Biomarkers of tobacco exposure:</b><br>Anabasine, cotinine                                                                                                                                                                       |
|    | <b>Biomarkers of cannabis exposure:</b><br>Cannabinol, THC-COOH, THC                                                                                                                                                                |
|    | <b>Pharmaceuticals:</b><br>Ropivacaine, 3-hydroxyropivacaine, lidocaine, norlidocaine, 3-hydroxylidocaine, amoxicillin, cefazolin, ephedrine, lamotrigine, norfentanyl, venlafaxine, N-desmethylvenlafaxine, O-desmethylvenlafaxine |
| 23 | <b>Biomarkers of tobacco exposure:</b><br>Anabasine, cotinine                                                                                                                                                                       |
|    | <b>Pharmaceuticals:</b><br>Lidocaine, 3-hydroxylidocaine, ropivacaine, hydroxyzine, cetirizine, 1-(4-chlorophenyl) -phenylmethyl piperazine, codeine, morphine, N-desmethyltramadol, norfentanyl, paracetamol                       |
|    | <b>Biomarkers of cannabis exposure:</b><br>THC-OH, THC-COOH                                                                                                                                                                         |
| 24 | <b>Pharmaceuticals:</b><br>Lidocaine, norlidocaine, norfentanyl, ropivacaine                                                                                                                                                        |
|    | <b>Biomarkers of tobacco exposure:</b><br>Anabasine, cotinine                                                                                                                                                                       |
|    | <b>Pharmaceuticals:</b><br>Hydroxyzine, 1-(4-chlorophenyl) -phenylmethyl piperazine, bupivacaine, cimetidine, labetalol, lormetazepam, nicardipine, nordiazepam, oxazepam, temazepam, paracetamol, sertraline, zolpidem             |
| 25 | <b>Biomarkers of tobacco exposure:</b><br>Anabasine, cotinine                                                                                                                                                                       |
|    | <b>Biomarkers of cannabis exposure:</b><br>Cannabinol, THC-COOH, THC, 11-OH-THC                                                                                                                                                     |
|    | <b>Pharmaceuticals:</b><br>Lidocaine, norlidocaine, ropivacaine                                                                                                                                                                     |
| 26 | <b>Pharmaceuticals:</b><br>7-aminoclonazepam, lamotrigine, levetiracetam, norfentanyl, norlidocaine, paracetamol                                                                                                                    |
|    | <b>Pharmaceuticals:</b><br>Amoxapine, loxapine, clonidine, oxazepam                                                                                                                                                                 |
|    | <b>Biomarkers of tobacco exposure:</b><br>Anabasine                                                                                                                                                                                 |
| 27 | <b>Pharmaceuticals:</b><br>Lidocaine, metoclopramide, morphine, norlidocaine, tramadol                                                                                                                                              |
|    |                                                                                                                                                                                                                                     |
|    |                                                                                                                                                                                                                                     |
